# Supplementary material for: Validation of use of the miniPCR thermocycler for Ebola and Zika virus detection
Source: PLoS One. 2019 May 9;14(5):e0215642. doi: 10.1371/journal.pone.0215642 (PMC6508694; doi:10.1371/journal.pone.0215642)
Supplement: S3 Dataset — Average amount of nucleic acid material recovered, as quantified by SYBR Green qPCR staining and fluorescence measurements in a real time thermocycler. (XLSX) [file pone.0215642.s003.xlsx]

## Sheet: Results moniPCR-SYBR Green
	Supporting Information- Dataset for Figure 4C
Block Type	96fast
Chemistry	SYBR_GREEN					PCR Normal
Experiment File Name	C:\Documents and Settings\Administrator\Desktop\miniPCR2.eds						RT-PCR Cycle (@21C)
Experiment Run End Time	2018-12-23 17:18:19 PM CST						1	2	3	4	5	6	7	8	9	10
Instrument Type	sds7500fast					Negative	1.7881e+06	1.78454e+06	1.78263e+06	1.78208e+06	1.78061e+06	1.7805e+06	1.77902e+06	1.77563e+06	1.7764e+06	1774844
Passive Reference	ROX					Replica 1	2.19935e+06	2.19985e+06	2.19586e+06	2193171	2.19173e+06	2.19159e+06	2.1881e+06	2.19949e+06	2194159	2.19502e+06
						Replica 2	2.12696e+06	2.12312e+06	2.12019e+06	2.11962e+06	2.1202e+06	2.1184e+06	2.1154e+06	2.11578e+06	2111703	2.11197e+06
						Replica 3	2.05829e+06	2.05526e+06	2052571	2.04794e+06	2.04753e+06	2.04422e+06	2.03906e+06	2.03346e+06	2.03386e+06	2.03054e+06
						Replica 4	2.33313e+06	2.33e+06	2323275	2318065	2.31474e+06	2.31454e+06	2.31259e+06	2311556	2.31001e+06	2.305e+06
						Replica 5	2.52356e+06	2.51946e+06	2516661	2.51424e+06	2.51058e+06	2.50661e+06	2.50632e+06	2.50164e+06	2.49815e+06	2.50009e+06
						Replica 6	2.4069e+06	2404806	2.40189e+06	2399056	2.39315e+06	2.39344e+06	2.38989e+06	2386665	2381711	2.37858e+06
						Replica 7	2.32978e+06	2324982	2.32182e+06	2.31926e+06	2.3118e+06	2307398	2.39711e+06	2.39444e+06	2.39134e+06	2388706			promedio	desv STD
								promedio	2.27604e+06									miniPCR	3.35415e+06	229674
								desv STD	156293									PCR	2.27604e+06	156293
								cv=	0.0686689
						miniPCR
							RT-PCR Cycle (@21C)
							1	2	3	4	5	6	7	8	9	10
						Negative	2.85846e+06	2.84999e+06	2841431	2.83874e+06	2831828	2.83246e+06	2.82949e+06	2829662	2.82646e+06	2.82045e+06
						Replica 1	3.01483e+06	3.00661e+06	3010529	3.00515e+06	3001416	3.00026e+06	2.99767e+06	2.99585e+06	2.99354e+06	2.99348e+06
						Replica 2	3.25949e+06	3.25448e+06	3.24906e+06	3.24061e+06	3.23938e+06	3234598	3.23079e+06	3.22701e+06	3222945	3.22286e+06
						Replica 3	3.53223e+06	3.52256e+06	3.51566e+06	3.50639e+06	3.50165e+06	3.49424e+06	3492842	3485133	3.4977e+06	3495088
						Replica 4	3.19039e+06	3.18431e+06	3.18001e+06	3.17765e+06	3.17731e+06	3.17462e+06	3173924	3.17156e+06	3.17235e+06	3.17134e+06
						Replica 5	3.28465e+06	3272364	3.26616e+06	3.25924e+06	3252178	3243988	3.2427e+06	3.23427e+06	3.22997e+06	3233325
						Replica 6	3.59524e+06	3592016	3.58736e+06	3.5783e+06	3.56982e+06	3.55803e+06	3.54971e+06	3.53782e+06	3525084	3522285
						Replica 7	3685236	3679759	3.67024e+06	3.65437e+06	3.63999e+06	3.63196e+06	3.62079e+06	3.61245e+06	3.60282e+06	3.60392e+06
								promedio	3.35415e+06
								desv STD	229674
								cv=	0.0684746
